# Supplementary material
Source: PubMed Central journal article supplement (PMC2952580)

## Legends to supplemental figures

**Figure S1.** Representative EIC of the  $[M-H]^-$  detected for FFA with an odd CN, such as FFA 15:1, FFA 15:0, FFA 17:1, and FFA 17:0 separated by RR-RP-HPLC and detected with -ESI/TOF-MS.

**Figure S2.** Representative EIC of the  $[M-H]^-$  detected for FFA 18:2 by RR-RP-HPLC and -ESI/TOF-MS in sebum from an individual donor (a) and EIC of authentic linoleic acid (b) analyzed in the same conditions as sebum.

**Figure S3.** Within class distribution of mono- (a) and di- (d) unsaturated WE identified in sebum. Data were reported as mean  $\pm$  SD calculated following RR-RP-HPLC/TOF-MS analysis of sebum from the 12 donors. Full and dashed lines represent WE with an even and an odd CN, respectively.

**Figure S4.** Within class distribution of FFA in sebum according to their CN. FFA were subgrouped by their DB number. Data were reported as mean  $\pm$  SD calculated for the 12 sebum donors. Full and dashed lines represented FFA with an even and an odd CN, respectively.

Figure S1

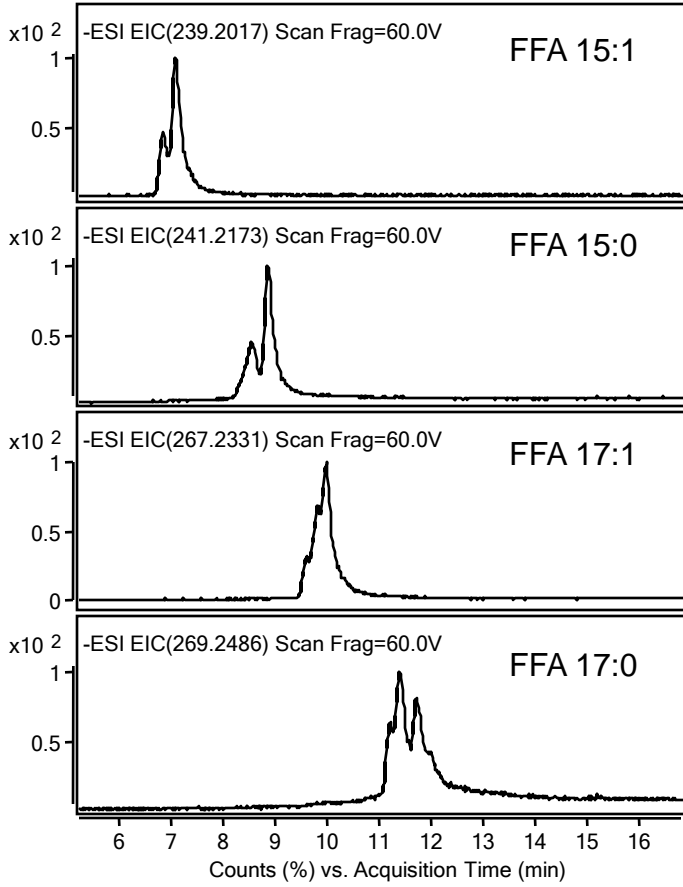

Figure S2

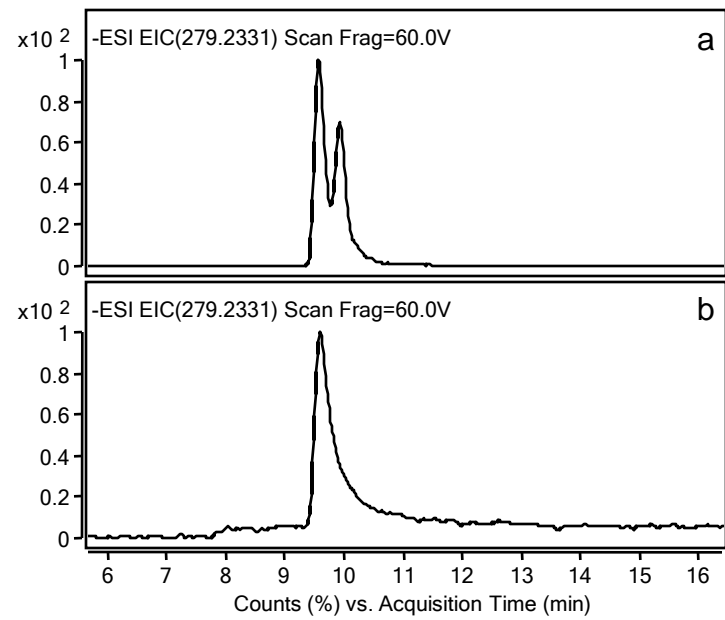

Figure S3

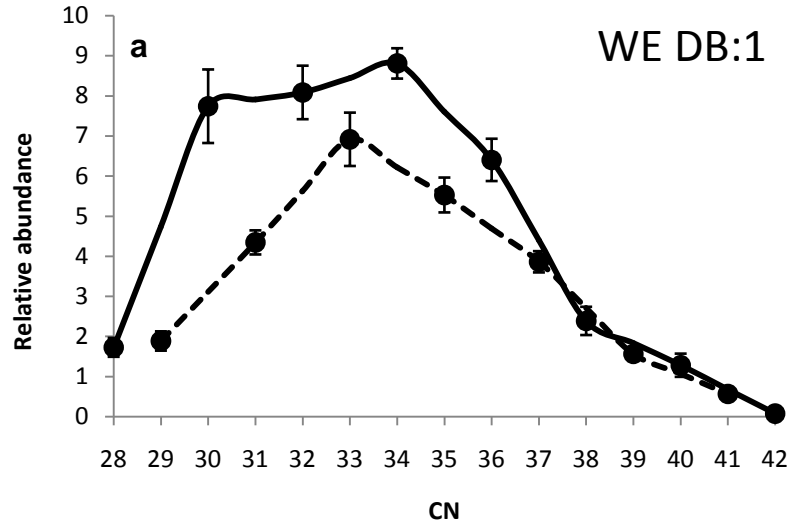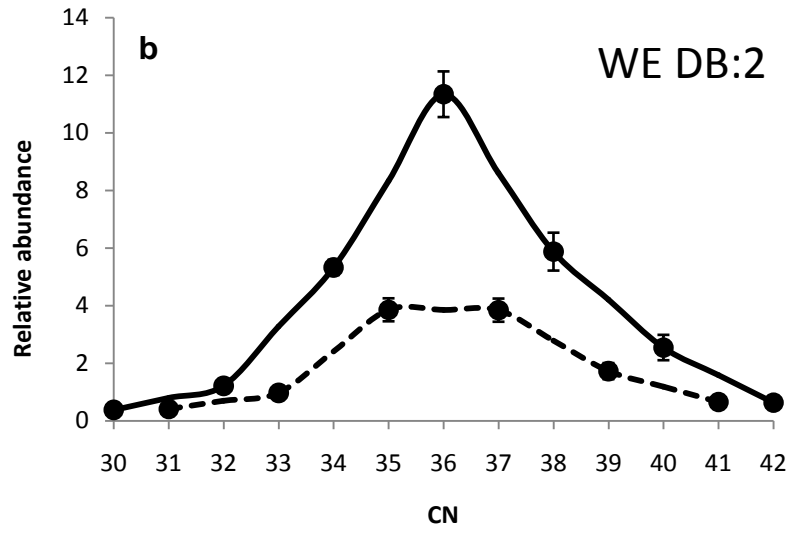

Figure S4

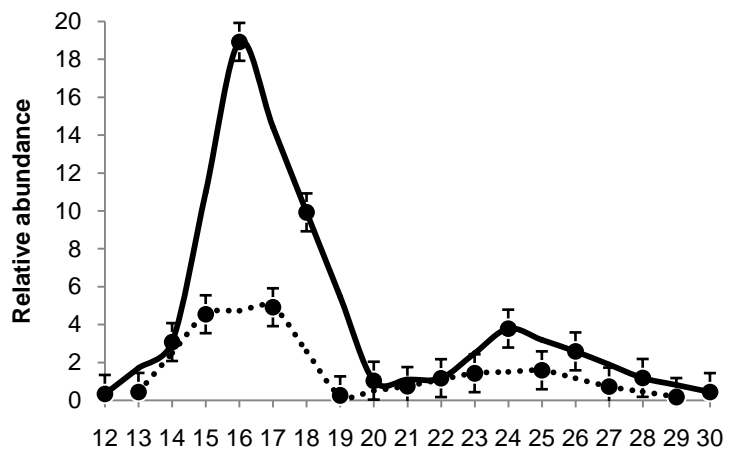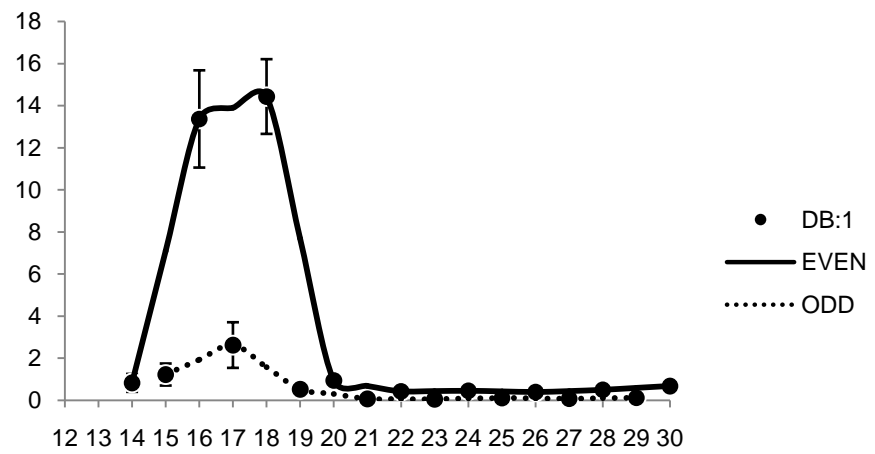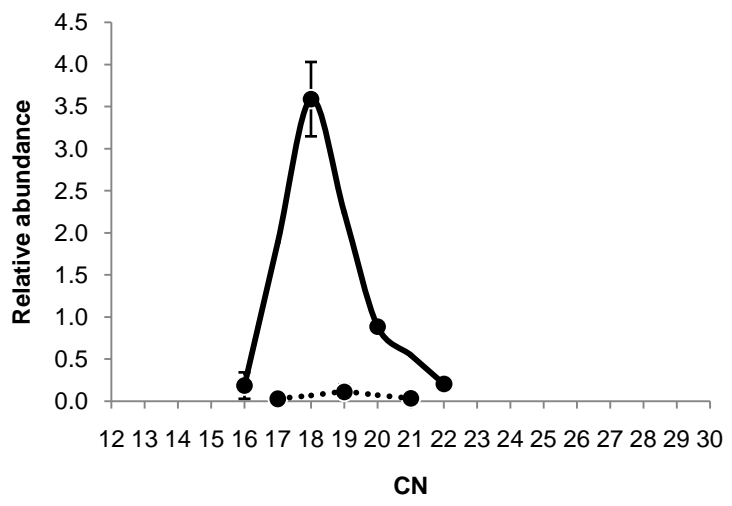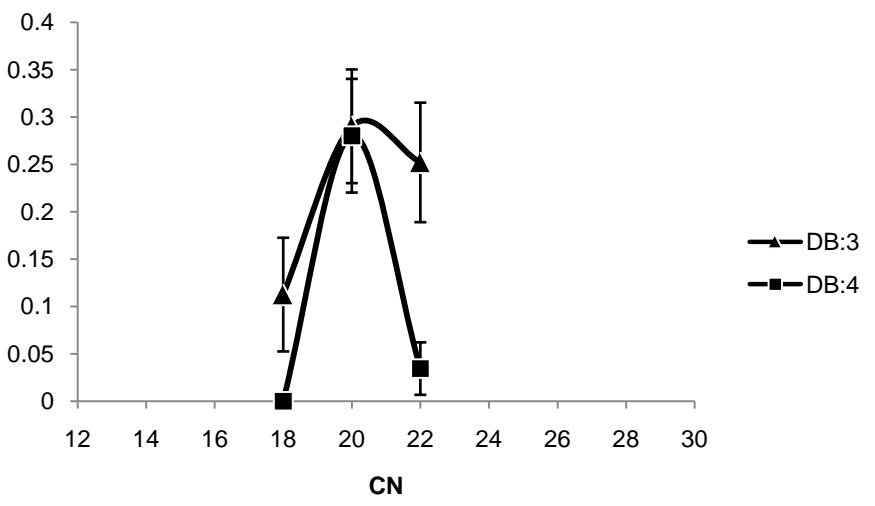

Supplement: supp_D008391_jlr.D008391-1.pdf [file supp_D008391_jlr.D008391-1.pdf]
