# Supplementary material
Source: PubMed Central journal article supplement (PMC2952580)
Supplement: supp_D008391_jlr.D008391-2.pdf [file supp_D008391_jlr.D008391-2.pdf]

Table S2  
DAG detected in sebum by RR-RP-HPLC/ESI TOF-MS and MS/MS

|          | Species  | RT (min) | SD    | [M+NH <sub>4</sub> ] <sup>+</sup> formula | calculated m/z | [M+NH <sub>4</sub> -R1COONH <sub>4</sub> ] <sup>+</sup> formula | calculated m/z | [M+NH <sub>4</sub> -R2COONH <sub>4</sub> ] <sup>+</sup> formula | calculated m/z | NL (QqQ) | substituent FA |            |
|----------|----------|----------|-------|-------------------------------------------|----------------|-----------------------------------------------------------------|----------------|-----------------------------------------------------------------|----------------|----------|----------------|------------|
| DB:0     | DAG 28:0 | 19.50    | 0.025 | C31 H64 NO5                               | 530.4784       | C17 H33 O3                                                      | 285.2431       | R1=R2                                                           | 285.2431       | 245      | 14:0; 14:0     |            |
|          | DAG 29:0 | 19.87    | 0.034 | C32 H66 N O5                              | 544.4941       | C17 H33 O3                                                      | 285.2431       | C18 H35 O3                                                      | 299.2586       | 245; 259 | 14:0; 15:0     |            |
|          | DAG 30:0 | 20.47    | 0.032 | C33 H68 N O5                              | 558.5097       | C17 H33 O3                                                      | 285.2431       | C19 H37 O3                                                      | 313.2743       | 245; 273 | 14:0; 16:0     |            |
|          | DAG 31:0 | 20.85    | 0.047 | C34 H70 NO5                               | 572.5254       | C18 H35 O3                                                      | 299.2586       | C19 H37 O3                                                      | 313.2743       | 259; 273 | 15:0; 16:0     |            |
|          | DAG 31:0 | "        | "     | "                                         | "              | C17 H33 O3                                                      | 285.2431       | C20 H39 O3                                                      | 327.2899       | 245; 287 | 14:0; 17:0     |            |
|          | DAG 32:0 | 21.33    | 0.037 | C35 H72 N O5                              | 586.5411       | C19 H37 O3                                                      | 313.2743       | R1=R2                                                           | 313.2743       | 273      | 16:0; 16:0     |            |
|          | DAG 32:0 | "        | "     | "                                         | "              | C17 H33 O3                                                      | 285.2431       | C21 H41 O3                                                      | 341.3056       | 245; 301 | 14:0; 18:0     |            |
|          | DAG 32:0 | "        | "     | "                                         | "              | C18 H35 O3                                                      | 299.2586       | C20 H39 O3                                                      | 327.2899       | 259; 287 | 15:0; 17:0     |            |
|          | DAG 33:0 | 21.64    | 0.034 | C36 H74 NO5                               | 600.5567       | C19 H37 O3                                                      | 313.2743       | C20 H39 O3                                                      | 327.2899       | 273; 287 | 16:0; 17:0     |            |
|          | DAG 34:0 | 22.11    | 0.036 | C37 H76 NO5                               | 614.5723       | C19 H37 O3                                                      | 313.2743       | C21 H41 O3                                                      | 341.3056       | 273; 301 | 16:0; 18:0     |            |
|          | DAG 34:0 | "        | "     | "                                         | "              | "                                                               | "              | R1=R2                                                           | 327.2899       | 287      | 17:0; 17:0     |            |
|          | DAG 35:0 | 22.18    | 0.035 | C38 H78 NO5                               | 628.5881       | C20 H39 O3                                                      | 327.2899       | C21 H41 O3                                                      | 341.3056       | 287; 301 | 17:0; 18:0     |            |
|          | DAG 36:0 | 22.50    | 0.020 | C39 H80 NO5                               | 642.6036       | C21 H41 O3                                                      | 341.3056       | R1=R2                                                           | 341.3056       | 301      | 18:0; 18:0     |            |
|          | DB:1     | DAG 28:1 | 18.83 | 0.048                                     | C31 H62 NO5    | 528.4628                                                        | C17 H33 O3     | 285.2431                                                        | C17 H31 O3     | 283.2273 | 243; 245       | 14:1; 14:0 |
|          |          | DAG 29:1 | 19.24 | 0.046                                     | C32 H64 NO5    | 542.4784                                                        | C17 H31 O3     | 283.2273                                                        | C18 H35 O3     | 299.2586 | 243; 259       | 14:1; 15:0 |
|          |          | DAG 30:1 | 19.88 | 0.044                                     | C33 H66 N O5   | 556.4941                                                        | C17 H31 O3     | 283.2273                                                        | C19 H37 O3     | 313.2743 | 243; 273       | 14:1; 16:0 |
| DAG 30:1 |          | "        | "     | "                                         | "              | C17 H33 O3                                                      | 285.2431       | C19 H35 O3                                                      | 311.2586       | 245; 271 | 14:0; 16:1     |            |
| DAG 31:1 |          | 20.31    | 0.077 | C34 H68 NO5                               | 570.5097       | C18 H33 O3                                                      | 297.2431       | C19 H37 O3                                                      | 313.2743       | 257; 273 | 15:1; 16:0     |            |
| DAG 31:1 |          | "        | "     | "                                         | "              | C16 H29 O3                                                      | 269.2117       | C21 H41 O3                                                      | 341.3056       | 229; 301 | 13:1; 18:0     |            |
| DAG 31:1 |          | "        | "     | "                                         | "              | C18 H35 O3                                                      | 299.2586       | C19 H35 O3                                                      | 311.2586       | 259; 271 | 15:0; 16:1     |            |
| DAG 32:1 |          | 20.80    | 0.040 | C35 H70 NO5                               | 584.5254       | C17 H33 O3                                                      | 285.2431       | C21 H39 O3                                                      | 339.2899       | 245; 299 | 14:0; 18:1     |            |
| DAG 32:1 |          | "        | "     | "                                         | "              | C19 H35 O3                                                      | 311.2586       | C19 H37 O3                                                      | 313.2743       | 271; 273 | 16:1; 16:0     |            |
| DAG 33:1 |          | 21.15    | 0.037 | C36 H72 N O5                              | 598.5411       | C18 H33 O3                                                      | 297.2431       | C21 H41 O3                                                      | 341.3056       | 257; 301 | 15:1; 18:0     |            |
| DAG 33:1 |          | "        | "     | "                                         | "              | C18 H35 O3                                                      | 299.2586       | C21 H39 O3                                                      | 339.2899       | 259; 299 | 15:0; 18:1     |            |
| DAG 33:1 |          | "        | "     | "                                         | "              | C19 H35 O3                                                      | 311.2586       | C20 H39 O3                                                      | 327.2899       | 271; 287 | 16:1; 17:0     |            |
| DAG 33:1 |          | "        | "     | "                                         | "              | C19 H37 O3                                                      | 313.2743       | C20 H37 O3                                                      | 325.2743       | 273; 285 | 16:0; 17:1     |            |
| DAG 34:1 |          | 21.55    | 0.035 | C37 H74 N O5                              | 612.5567       | C19 H37 O3                                                      | 313.2743       | C21 H39 O3                                                      | 339.2899       | 273; 299 | 16:0; 18:1     |            |
| DAG 34:1 |          | "        | "     | "                                         | "              | C19 H35 O3                                                      | 311.2586       | C21 H41 O3                                                      | 341.3056       | 271; 301 | 16:1; 18:0     |            |
| DAG 35:1 |          | 21.73    | 0.154 | C38 H76 NO5                               | 626.5723       | C19 H37 O3                                                      | 313.2743       | C22 H41 O3                                                      | 353.3056       | 273; 313 | 16:0; 19:1     |            |
| DAG 35:1 |          | "        | "     | "                                         | "              | C19 H35 O3                                                      | 311.2586       | C22 H43 O3                                                      | 355.3212       | 271; 315 | 16:1; 19:0     |            |
| DAG 35:1 |          | "        | "     | "                                         | "              | C20 H39 O3                                                      | 327.2899       | C21 H39 O3                                                      | 339.2899       | 287; 299 | 17:0; 18:1     |            |
| DAG 36:1 |          | 22.29    | 0.043 | C39 H78 NO5                               | 640.5881       | C19 H37 O3                                                      | 313.2743       | C23 H43 O3                                                      | 367.3212       | 273; 327 | 16:0; 20:1     |            |
| DAG 36:1 |          | "        | "     | "                                         | "              | C21 H39 O3                                                      | 339.2899       | C21 H41 O3                                                      | 341.3056       | 299; 301 | 18:1; 18:0     |            |
| DB:2     |          | DAG 28:2 | 18.48 | 0.058                                     | C31 H60 NO5    | 526.4471                                                        | C17 H31 O3     | 283.2273                                                        | R1=R2          | 283.2273 | 243            | 14:1; 14:1 |
|          |          | DAG 30:2 | 19.25 | 0.045                                     | C33 H64 NO5    | 554.4784                                                        | C17 H31 O3     | 283.2273                                                        | C19 H35 O3     | 311.2586 | 243; 271       | 14:1; 16:1 |
|          |          | DAG 31:2 | 19.77 | 0.045                                     | C34 H66 NO5    | 568.4941                                                        | C18 H33 O3     | 297.2431                                                        | C19 H35 O3     | 311.2586 | 257; 271       | 15:1; 16:1 |
|          |          | DAG 32:2 | 20.24 | 0.038                                     | C35 H68 NO5    | 582.5097                                                        | C19 H35 O3     | 311.2586                                                        | R1=R2          | 311.2586 | 271            | 16:1; 16:1 |
|          | DAG 32:2 | "        | "     | "                                         | "              | C17 H31 O3                                                      | 283.2273       | C21 H39 O3                                                      | 339.2899       | 243; 299 | 14:1; 18:1     |            |
|          | DAG 32:2 | "        | "     | "                                         | "              | C17 H33 O3                                                      | 285.2431       | C21 H37 O3                                                      | 337.2743       | 245; 297 | 14:0; 18:2     |            |
|          | DAG 33:2 | 20.63    | 0.037 | C36 H70 N O5                              | 596.5254       | C19 H35 O3                                                      | 311.2586       | C20 H37 O3                                                      | 325.2743       | 271; 285 | 16:1; 17:1     |            |
|          | DAG 33:2 | "        | "     | "                                         | "              | C18 H33 O3                                                      | 297.2431       | C21 H39 O3                                                      | 339.2899       | 257; 299 | 15:1; 18:1     |            |
|          | DAG 33:2 | "        | "     | "                                         | "              | C18 H35 O3                                                      | 299.2586       | C21 H37 O3                                                      | 337.2743       | 259; 297 | 15:0; 18:2     |            |
|          | DAG 34:2 | 21.04    | 0.044 | C37 H72 NO5                               | 610.5411       | C19 H35 O3                                                      | 311.2586       | C21 H39 O3                                                      | 339.2899       | 271; 299 | 16:1; 18:1     |            |
|          | DAG 34:2 | "        | "     | "                                         | "              | C19 H37 O3                                                      | 313.2743       | C21 H37 O3                                                      | 337.2743       | 273; 297 | 16:0; 18:2     |            |
|          | DAG 35:2 | 21.25    | 0.184 | C38 H74 NO5                               | 624.5567       | C20 H39 O3                                                      | 327.2899       | C21 H37 O3                                                      | 337.2743       | 287; 297 | 17:0; 18:2     |            |
|          | DAG 35:2 | "        | "     | "                                         | "              | C19 H35 O3                                                      | 311.2586       | C22 H41 O3                                                      | 353.3056       | 271; 313 | 16:1; 19:1     |            |
|          | DAG 35:2 | "        | "     | "                                         | "              | C20 H37 O3                                                      | 325.2743       | C21 H39 O3                                                      | 339.2899       | 285; 299 | 17:1; 18:1     |            |
|          | DAG 36:2 | 21.75    | 0.032 | C39 H76 NO5                               | 638.5723       | C21 H39 O3                                                      | 339.2899       | R1=R2                                                           | 339.2899       | 299      | 18:1; 18:1     |            |
|          | DB:3     | DAG 34:3 | 20.62 | 0.037                                     | C37 H70 NO5    | 608.5254                                                        | C19 H35 O3     | 311.2586                                                        | C21 H37 O3     | 337.2743 | 271; 297       | 16:1; 18:2 |
| DAG 34:3 |          | "        | "     | "                                         | "              | C17 H31 O3                                                      | 283.2273       | C23 H41 O3                                                      | 365.3056       | 243; 325 | 14:1; 20:2     |            |
| DAG 36:3 |          | 21.35    | 0.077 | C39 H74 NO5                               | 636.5567       | C21 H37 O3                                                      | 337.2743       | C21 H39 O3                                                      | 339.2899       | 297; 299 | 18:2; 18:1     |            |
| DB:4     | DAG 36:4 | 20.68    | 0.038 | C39 H72 NO5                               | 634.5411       | C21 H37 O3                                                      | 337.2743       | R1=R2                                                           | 337.2743       | 297      | 18:2; 18:2     |            |

Table S3

WE tentatively identified in sebum by RR-RP-HPLC/ESI TOF-MS and MS/MS

| No.  | FA 16:1-WE | FOH     | RT (min) | SD   | [M+H] <sup>+</sup> formula | calculated m/z | average m/z | SD       | ppm    |      |
|------|------------|---------|----------|------|----------------------------|----------------|-------------|----------|--------|------|
| DB:1 | 1          | WE 28:1 | 12:0     | 21.6 | 0.04                       | C28 H55 O2     | 423.4202    | 423.4199 | 0.0012 | 2.41 |
|      | 2          | WE 29:1 | 13:0     | 22.0 | 0.04                       | C29 H57 O2     | 437.4359    | 437.4363 | 0.0017 | 3.56 |
|      | 3          | WE 30:1 | 14:0     | 22.4 | 0.04                       | C30 H59 O2     | 451.4515    | 451.4520 | 0.0015 | 3.33 |
|      | 4          | WE 31:1 | 15:0     | 22.8 | 0.04                       | C31 H61 O2     | 465.4672    | 465.4675 | 0.0015 | 2.90 |
|      | 5          | WE 32:1 | 16:0     | 23.2 | 0.04                       | C32 H63 O2     | 479.4828    | 479.4834 | 0.0016 | 3.11 |
|      | 6          | WE 33:1 | 17:0     | 23.6 | 0.04                       | C33 H65 O2     | 493.4985    | 493.4990 | 0.0015 | 3.02 |
|      | 7          | WE 34:1 | 18:0     | 24.0 | 0.05                       | C34 H67 O2     | 507.5141    | 507.5146 | 0.0017 | 3.14 |
|      | 8          | WE 35:1 | 19:0     | 24.4 | 0.06                       | C35 H69 O2     | 521.5298    | 521.5297 | 0.0018 | 2.83 |
|      | 9          | WE 36:1 | 20:0     | 24.9 | 0.07                       | C36 H71 O2     | 535.5454    | 535.5447 | 0.0017 | 2.72 |
|      | 10         | WE 37:1 | 21:0     | 25.3 | 0.07                       | C37 H73 O2     | 549.5611    | 549.5612 | 0.0015 | 2.05 |
|      | 11         | WE 38:1 | 22:0     | 25.8 | 0.12                       | C38 H75 O2     | 563.5767    | 563.5775 | 0.0021 | 3.60 |
|      | 12         | WE 39:1 | 23:0     | 26.4 | 0.09                       | C39 H77 O2     | 577.5924    | 577.5928 | 0.0027 | 3.84 |
|      | 13         | WE 40:1 | 24:0     | 27.0 | 0.13                       | C40 H79 O2     | 591.6081    | 591.6084 | 0.0021 | 3.20 |
|      | 14         | WE 41:1 | 25:0     | 27.6 | 0.11                       | C41 H81 O2     | 605.6231    | 605.6219 | 0.0027 | 4.44 |
|      | 15         | WE 42:1 | 26:0     | 28.2 | 0.12                       | C42 H83 O2     | 619.6393    | 619.6393 | 0.0021 | 2.52 |
| DB:2 | 1          | WE 30:2 | 14:1     | 21.9 | 0.03                       | C30 H57 O2     | 449.4353    | 449.4344 | 0.0016 | 2.10 |
|      | 2          | WE 31:2 | 15:1     | 22.3 | 0.03                       | C31 H59 O2     | 463.4509    | 463.4511 | 0.0014 | 1.17 |
|      | 3          | WE 32:2 | 16:1     | 22.7 | 0.03                       | C32 H61 O2     | 477.4666    | 477.4668 | 0.0013 | 1.65 |
|      | 4          | WE 33:2 | 17:1     | 23.0 | 0.05                       | C33 H63 O2     | 491.4823    | 491.4824 | 0.0016 | 2.50 |
|      | 5          | WE 34:2 | 18:1     | 23.4 | 0.04                       | C34 H65 O2     | 505.4979    | 505.4986 | 0.0015 | 2.44 |
|      | 6          | WE 35:2 | 19:1     | 23.7 | 0.04                       | C35 H67 O2     | 519.5136    | 519.5145 | 0.0016 | 3.17 |
|      | 7          | WE 36:2 | 20:1     | 24.1 | 0.05                       | C36 H69 O2     | 533.5292    | 533.5311 | 0.0009 | 2.80 |
|      | 8          | WE 37:2 | 21:1     | 24.6 | 0.05                       | C37 H71 O2     | 547.5449    | 547.5455 | 0.0015 | 2.03 |
|      | 9          | WE 38:2 | 22:1     | 25.0 | 0.06                       | C38 H73 O2     | 561.5605    | 561.5613 | 0.0015 | 2.27 |
|      | 10         | WE 39:2 | 23:1     | 25.5 | 0.05                       | C39 H75 O2     | 575.5762    | 575.5761 | 0.0016 | 1.08 |
|      | 11         | WE 40:2 | 24:1     | 26.1 | 0.08                       | C40 H77 O2     | 589.5918    | 589.5922 | 0.0017 | 1.92 |
|      | 12         | WE 41:2 | 25:1     | 26.5 | 0.12                       | C41 H79 O2     | 603.6075    | 603.6071 | 0.0018 | 2.03 |
|      | 13         | WE 42:2 | 26:1     | 27.1 | 0.10                       | C42 H81 O2     | 617.6231    | 617.6227 | 0.0018 | 2.13 |

Table S4  
 CE tentatively identified in sebum with RR-RP-HPLC/ESI TOF-MS and MS/MS

| No. | Species | RT   | SD   | [M+Na] <sup>+</sup> formula | calculated m/z | detected m/z | SD     | ppm | PI (QqQ)<br>[RCOOH+Na] <sup>+</sup> |
|-----|---------|------|------|-----------------------------|----------------|--------------|--------|-----|-------------------------------------|
| 1   | CE 14:1 | 26.7 | 0.05 | C41 H70 Na O2               | 617.5274       | 617.5295     | 0.0031 | 3.4 | 249.2                               |
| 2   | CE 15:1 | 27.4 | 0.05 | C42 H72 Na O2               | 631.5431       | 631.5447     | 0.0056 | 2.5 | 263.1                               |
| 3   | CE 16:0 | 29.5 | 0.16 | C43 H76 Na O2               | 647.5738       | 647.5759     | 0.0017 | 3.2 | 279.3                               |
| 4   | CE 16:1 | 28.1 | 0.06 | C43 H74 Na O2               | 645.5581       | 645.5591     | 0.0018 | 1.6 | 277.4                               |
| 5   | CE 16:2 | 27.1 | 0.05 | C43 H72 Na O2               | 643.5431       | 643.5432     | 0.0058 | 0.2 | 275.2                               |
| 6   | CE 17:1 | 28.8 | 0.07 | C44 H76 Na O2               | 659.5743       | 659.5755     | 0.0037 | 1.9 | 291.1                               |
| 7   | CE 18:0 | 31.4 | 0.10 | C45 H80 Na O2               | 675.6056       | 675.6034     | 0.0021 | 3.3 | 307.3                               |
| 8   | CE 18:1 | 29.8 | 0.08 | C45 H78 Na O2               | 673.5911       | 673.5897     | 0.0028 | 2.1 | 305.3                               |
| 9   | CE 18:2 | 28.5 | 0.06 | C45 H76 Na O2               | 671.5738       | 671.5745     | 0.0045 | 1.0 | 303.2                               |

Table S5  
 FFA tentatively identified in sebum by RR-RP-HPLC/ESI TOF-MS

| No. | Species | RT (min) | SD | [M-H] <sup>-</sup> formula | calculated m/z | average m/z | SD | ppm |
|-----|---------|----------|----|----------------------------|----------------|-------------|----|-----|
|-----|---------|----------|----|----------------------------|----------------|-------------|----|-----|

| DB:0 | No. | Species  | RT (min) | SD   | [M-H] <sup>-</sup> formula | calculated m/z | average m/z | SD     | ppm  |
|------|-----|----------|----------|------|----------------------------|----------------|-------------|--------|------|
|      | 1   | FFA 12:0 | 4.8      | 0.06 | C12 H23 O2                 | 199.1704       | 199.1702    | 0.0006 | 2.03 |
|      | 2   | FFA 13:0 | 5.9      | 0.16 | C13 H25 O2                 | 213.1861       | 213.1855    | 0.0005 | 2.73 |
|      | 3   | FFA 14:0 | 7.5      | 0.08 | C14 H27 O2                 | 227.2017       | 227.2022    | 0.0007 | 2.46 |
|      | 4   | FFA 15:0 | 9.0      | 0.08 | C15 H29 O2                 | 241.2173       | 241.2175    | 0.0004 | 1.25 |
|      | 5   | FFA 16:0 | 10.4     | 0.08 | C16 H31 O2                 | 255.2331       | 255.2337    | 0.0002 | 2.18 |
|      | 6   | FFA 17:0 | 11.7     | 0.21 | C17 H33 O2                 | 269.2486       | 269.2489    | 0.0002 | 1.23 |
|      | 7   | FFA 18:0 | 13.2     | 0.07 | C18 H35 O2                 | 283.2643       | 283.2651    | 0.0003 | 3.00 |
|      | 8   | FFA 19:0 | 14.4     | 0.08 | C19 H37 O2                 | 297.2799       | 297.2821    | 0.0042 | 1.94 |
|      | 9   | FFA 20:0 | 15.5     | 0.09 | C20 H39 O2                 | 311.2956       | 311.2961    | 0.0004 | 1.89 |
|      | 10  | FFA 21:0 | 16.4     | 0.07 | C21 H41 O2                 | 325.3112       | 325.3124    | 0.0010 | 3.78 |
|      | 11  | FFA 22:0 | 17.3     | 0.08 | C22 H43 O2                 | 339.3269       | 339.3276    | 0.0006 | 3.04 |
|      | 12  | FFA 23:0 | 18.1     | 0.08 | C23 H45 O2                 | 353.3425       | 353.3430    | 0.0003 | 1.43 |
|      | 13  | FFA 24:0 | 18.8     | 0.10 | C24 H47 O2                 | 367.3576       | 367.3474    | 0.0081 | 2.63 |
|      | 14  | FFA 25:0 | 19.4     | 0.07 | C25 H49 O2                 | 381.3733       | 381.3754    | 0.0003 | 4.05 |
|      | 15  | FFA 26:0 | 20.1     | 0.17 | C26 H51 O2                 | 395.3889       | 395.3914    | 0.0011 | 4.65 |
|      | 16  | FFA 27:0 | 20.7     | 0.05 | C27 H53 O2                 | 409.4046       | 409.4065    | 0.0003 | 3.44 |
|      | 17  | FFA 28:0 | 21.2     | 0.05 | C28 H55 O2                 | 423.4202       | 423.4223    | 0.0004 | 3.68 |
|      | 18  | FFA 29:0 | 21.6     | 0.10 | C29 H57 O2                 | 437.4359       | 437.3869    | 0.0999 | 1.57 |
|      | 19  | FFA 30:0 | 22.0     | 0.06 | C30 H59 O2                 | 451.4515       | 451.4525    | 0.0012 | 2.16 |

| DB:2 | No. | Species  | RT (min) | SD   | [M-H] <sup>-</sup> formula | calculated m/z | average m/z | SD     | ppm  |
|------|-----|----------|----------|------|----------------------------|----------------|-------------|--------|------|
|      | 1   | FFA 16:2 | 6.9      | 0.08 | C16 H27 O2                 | 251.2017       | 251.2014    | 0.0002 | 0.67 |
|      | 2   | FFA 17:2 | 8.4      | 0.14 | C17 H29 O2                 | 265.2173       | 265.2169    | 0.0005 | 3.50 |
|      | 3   | FFA 18:2 | 9.8      | 0.09 | C18 H31 O2                 | 279.2331       | 279.2336    | 0.0004 | 2.40 |
|      | 4   | FFA 19:2 | 11.3     | 0.08 | C19 H33 O2                 | 293.2486       | 293.2492    | 0.0008 | 2.48 |
|      | 5   | FFA 20:2 | 12.4     | 0.08 | C20 H35 O2                 | 307.2643       | 307.2649    | 0.0002 | 2.00 |
|      | 6   | FFA 21:2 | 13.5     | 0.10 | C21 H37 O2                 | 321.2794       | 321.2795    | 0.0012 | 2.83 |
|      | 7   | FFA 22:2 | 14.6     | 0.08 | C22 H39 O2                 | 335.2951       | 335.2959    | 0.0012 | 2.87 |

| No. | Species | RT (min) | SD | [M-H] <sup>-</sup> formula | calculated m/z | average m/z | SD | ppm |
|-----|---------|----------|----|----------------------------|----------------|-------------|----|-----|
|-----|---------|----------|----|----------------------------|----------------|-------------|----|-----|

| DB:1 | No. | Species  | RT (min) | SD   | [M-H] <sup>-</sup> formula | calculated m/z | average m/z | SD     | ppm  |
|------|-----|----------|----------|------|----------------------------|----------------|-------------|--------|------|
|      |     |          |          |      |                            |                |             |        |      |
|      |     |          |          |      |                            |                |             |        |      |
|      | 1   | FFA 14:1 | 5.8      | 0.07 | C14 H25 O2                 | 225.1861       | 225.1864    | 0.0004 | 1.77 |
|      | 2   | FFA 15:1 | 7.2      | 0.20 | C15 H27 O2                 | 239.2017       | 239.2018    | 0.0003 | 2.18 |
|      | 3   | FFA 16:1 | 8.6      | 0.08 | C16 H29 O2                 | 253.2173       | 253.2177    | 0.0005 | 1.83 |
|      | 4   | FFA 17:1 | 10.1     | 0.08 | C17 H31 O2                 | 267.2331       | 267.2334    | 0.0005 | 2.27 |
|      | 5   | FFA 18:1 | 11.3     | 0.08 | C18 H33 O2                 | 281.2486       | 281.2493    | 0.0004 | 2.44 |
|      | 6   | FFA 19:1 | 12.6     | 0.07 | C19 H35 O2                 | 295.2637       | 295.2644    | 0.0009 | 2.42 |
|      | 7   | FFA 20:1 | 13.8     | 0.07 | C20 H37 O2                 | 309.2799       | 309.2808    | 0.0006 | 2.73 |
|      | 8   | FFA 21:1 | 14.9     | 0.09 | C21 H39 O2                 | 323.2951       | 323.2954    | 0.0011 | 2.48 |
|      | 9   | FFA 22:1 | 15.9     | 0.08 | C22 H41 O2                 | 337.3107       | 337.3109    | 0.0006 | 1.14 |
|      | 10  | FFA 23:1 | 16.8     | 0.07 | C23 H43 O2                 | 351.3263       | 351.3278    | 0.0012 | 3.64 |
|      | 11  | FFA 24:1 | 17.6     | 0.08 | C24 H45 O2                 | 365.3421       | 365.4175    | 0.1507 | 2.22 |
|      | 12  | FFA 25:1 | 18.3     | 0.08 | C25 H47 O2                 | 379.3576       | 379.3587    | 0.0013 | 3.37 |
|      | 13  | FFA 26:1 | 19.0     | 0.09 | C26 H49 O2                 | 393.3733       | 393.3741    | 0.0020 | 4.64 |
|      | 14  | FFA 27:1 | 19.7     | 0.13 | C27 H51 O2                 | 407.3889       | 407.3897    | 0.0011 | 1.69 |
|      | 15  | FFA 28:1 | 20.3     | 0.11 | C28 H53 O2                 | 421.4046       | 421.4056    | 0.0008 | 3.34 |
|      | 16  | FFA 29:1 | 20.7     | 0.08 | C29 H55 O2                 | 435.4202       | 435.4204    | 0.0018 | 1.05 |
|      | 17  | FFA 30:1 | 21.2     | 0.05 | C30 H57 O2                 | 449.4359       | 449.4371    | 0.0009 | 2.36 |

| DB:3 | No. | Species  | RT (min) | SD   | [M-H] <sup>-</sup> formula | calculated m/z | average m/z | SD     | ppm  |
|------|-----|----------|----------|------|----------------------------|----------------|-------------|--------|------|
|      | 1   | FFA 18:3 | 8.2      | 0.09 | C18 H29 O2                 | 277.2168       | 277.2167    | 0.0009 | 2.79 |
|      | 2   | FFA 20:3 | 11.0     | 0.08 | C20 H33 O2                 | 305.2481       | 305.2484    | 0.0008 | 2.02 |
|      | 3   | FFA 22:3 | 13.4     | 0.07 | C22 H37 O2                 | 333.2794       | 333.2802    | 0.0004 | 1.07 |

| DB:4 | No. | Species  | RT (min) | SD   | [M-H] <sup>-</sup> formula | calculated m/z | average m/z | SD     | ppm  |
|------|-----|----------|----------|------|----------------------------|----------------|-------------|--------|------|
|      | 1   | FFA 20:4 | 9.7      | 0.32 | C20 H31 O2                 | 303.2324       | 303.2329    | 0.0008 | 2.06 |
|      | 2   | FFA 22:4 | 11.9     | 0.09 | C22 H35 O2                 | 331.2637       | 331.2650    | 0.0018 | 3.81 |
